# Supplementary material
Source: Springer Nature journal article supplement (https://www.springermedizin.de/resource/supplementary/13075_2004_1367_MOESM1_ESM.pdf/9689616)

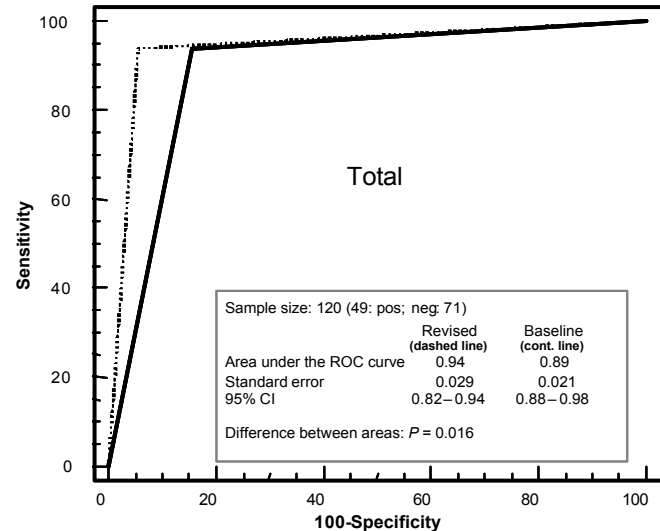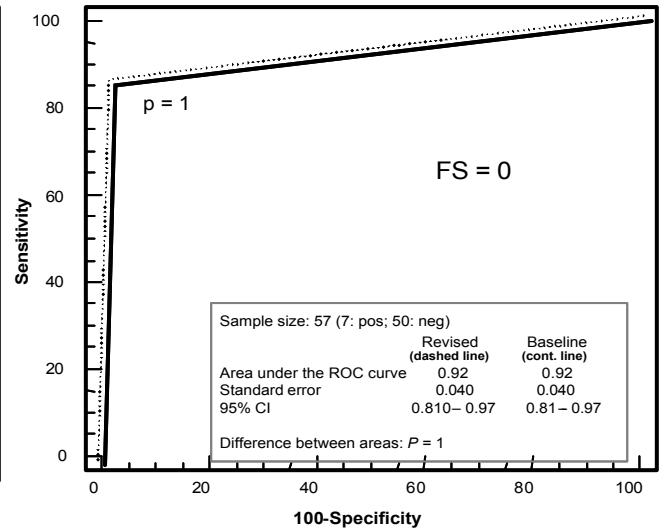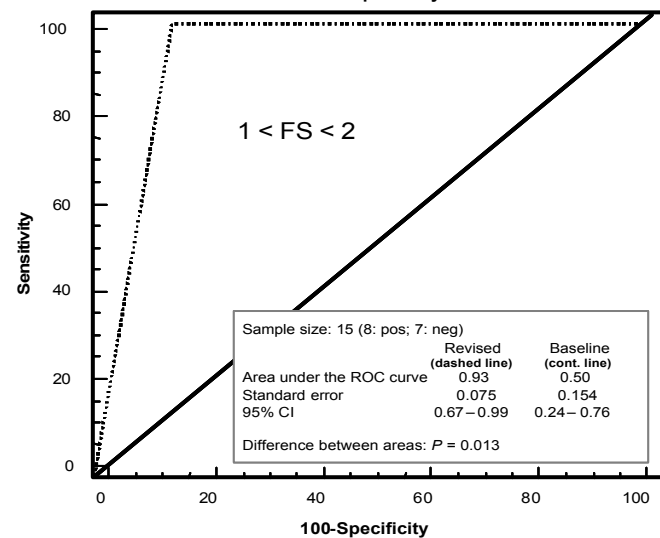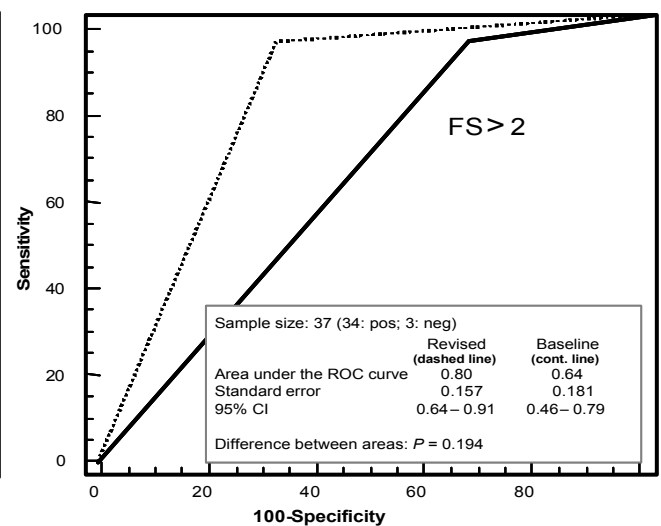

Supplement: MOESM1 [file 9689616]
